# Supplementary material
Source: Royal Society of Chemistry journal article supplement (doi:10.1039/d6cp00012f)
Supplement: d6cp00012f1.pdf [file d6cp00012f1.pdf]

Supplementary information

## **Tunable photoconductivity in bismuth-based hybrid perovskites via precursor stoichiometry and composition**

Goutam Paul<sup>1\*</sup>, and Bryon W. Larson<sup>1\*</sup>

<sup>1</sup>National Laboratory of the Rockies, 15013 Denver West Parkway, Golden, Colorado 80401, United States

### **Experimental details:**

#### **Fabrication of thin film:**

All thin-films used in this work were fabricated through solution processed spin-coating method. To fabricate bismuth halide, lead free perovskite thin films, a desired amount of organic/inorganic salt (e.g. MAI, CsI or BAI) and BiI<sub>3</sub> were added in a mixed solvent of DMF and DMSO and stirred overnight inside a glovebox. The solution was then spun on a pre-cleaned glass (or quartz) substrates at 2500 rpm for 30s followed by an annealing at 100 °C for 30 min.

#### **Characterization of thin films:**

Optical absorption spectra and X-ray diffraction patterns of the thin films of were obtained by Carry 6000i UV– vis–NIR spectrophotometer and Bruker D8 Advance X-ray powder diffractometer (Cu K $\alpha$  radiation,  $\lambda = 1.54 \text{ \AA}$ ) respectively. The topography measurements were carried out in a Nanosurf C3000 atomic force microscope.

TRMC measurements were done on the thin films fabricated on quartz substrate. The samples were placed in a microwave cavity at the end of an X-band waveguide operating at ca. 10 GHz and photoexcited through a grid with a 5 ns laser pulse from an OPO pumped by the third harmonic of an Nd:YAG laser. The interaction between photoinduced electrons and holes with the microwaves induced a change in microwave power ( $\Delta P$ ) in the cavity. The relative change ( $\Delta P/P$ ) in microwave power such as  $\Delta P/P = -K\Delta G$  ( $K$  is the calibration factor) is correlated with the transient photoconductance  $\Delta G$ . Considering that the electrons and holes are generated in pairs the peak photoconductance during the laser pulse can be expressed as

$$\Delta G = \beta q_e F_A I_0 (\Phi \cdot \Sigma \mu)$$

where  $\beta = 2.2$  is the geometric factor for the X-band waveguide used,  $q_e$  is the elementary charge,  $F_A$  is the fraction of light absorbed at the excitation wavelength,  $I_0$  is the incident photon flux,  $\Phi$  is the quantum efficiency or yield of free carrier generation per photon absorbed and  $\Sigma\mu$  the sum of the mobility of electrons and holes. The details of our experimental set up and procedure are described elsewhere. [1]

The product of free carrier generation per photon absorbed and local mobility of free carriers which is called the yield mobility product is considered as a figure of merit. Tracking this quantity over time after the end of the laser pulse provides insight into the free carrier generation, recombination and transport in the samples.

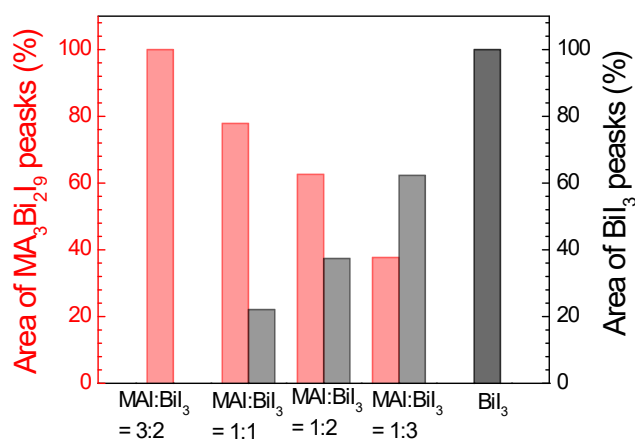

**Fig. S1** The relative contribution of the peak areas of MA<sub>3</sub>Bi<sub>2</sub>I<sub>9</sub> (0D phase) and BiI<sub>3</sub> (2D phase) to the total XRD pattern area of MABI thin films with varying MAI/BiI<sub>3</sub> ratios.

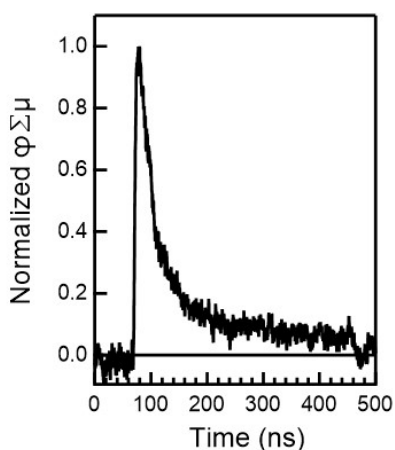

**Fig. S2** TRMC transients of BiI<sub>3</sub> thin film.

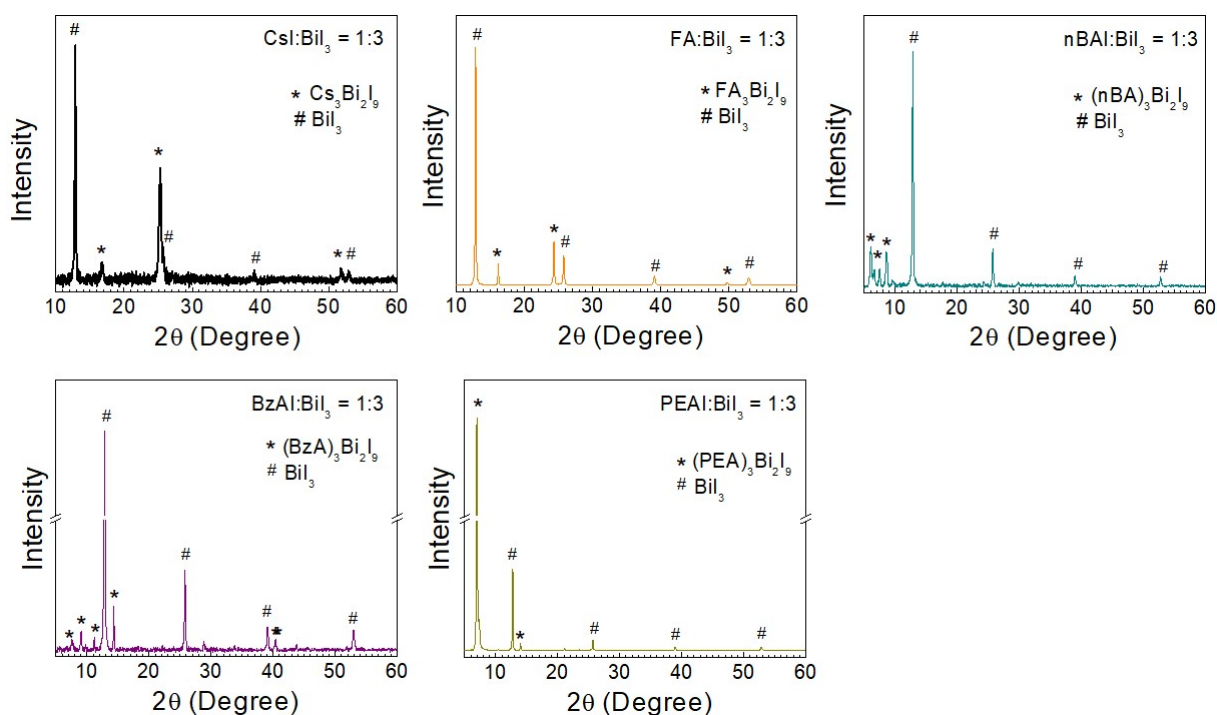

**Fig. S3** XRD pattern of Bi-based perovskite derivative thin films having different organic cations.

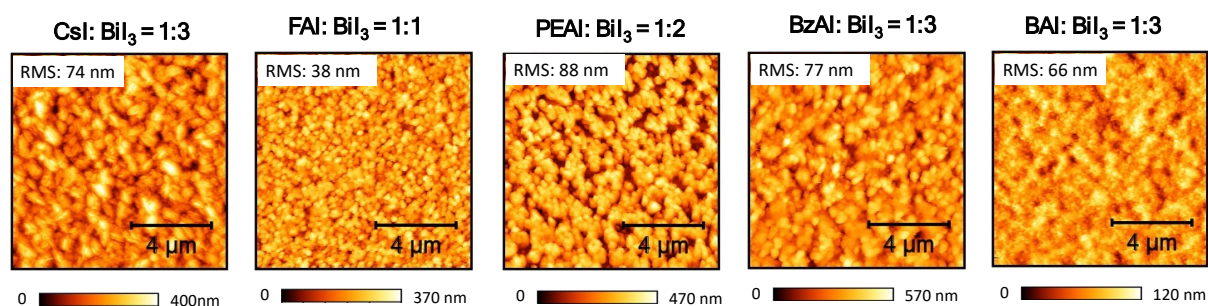

**Fig. S4** AFM topography of Bi-based perovskite derivative thin films having different organic cations

## References:

1. Microwave photoconductance spectrometer and methods of using the same, B. W. Larson. US Patent 11,563,405, 2023
